# Supplementary material for: The effect of age on ventilation management and clinical outcomes in critically ill COVID–19 patients––insights from the PRoVENT–COVID study
Source: publisher site journal article supplement (doi:10.18632/aging.203863), 2022-01-31
Supplement: Supplementary file [file aging-v14i3-203863-supplementary-material-SD2.pdf]

## SUPPLEMENTARY FIGURES

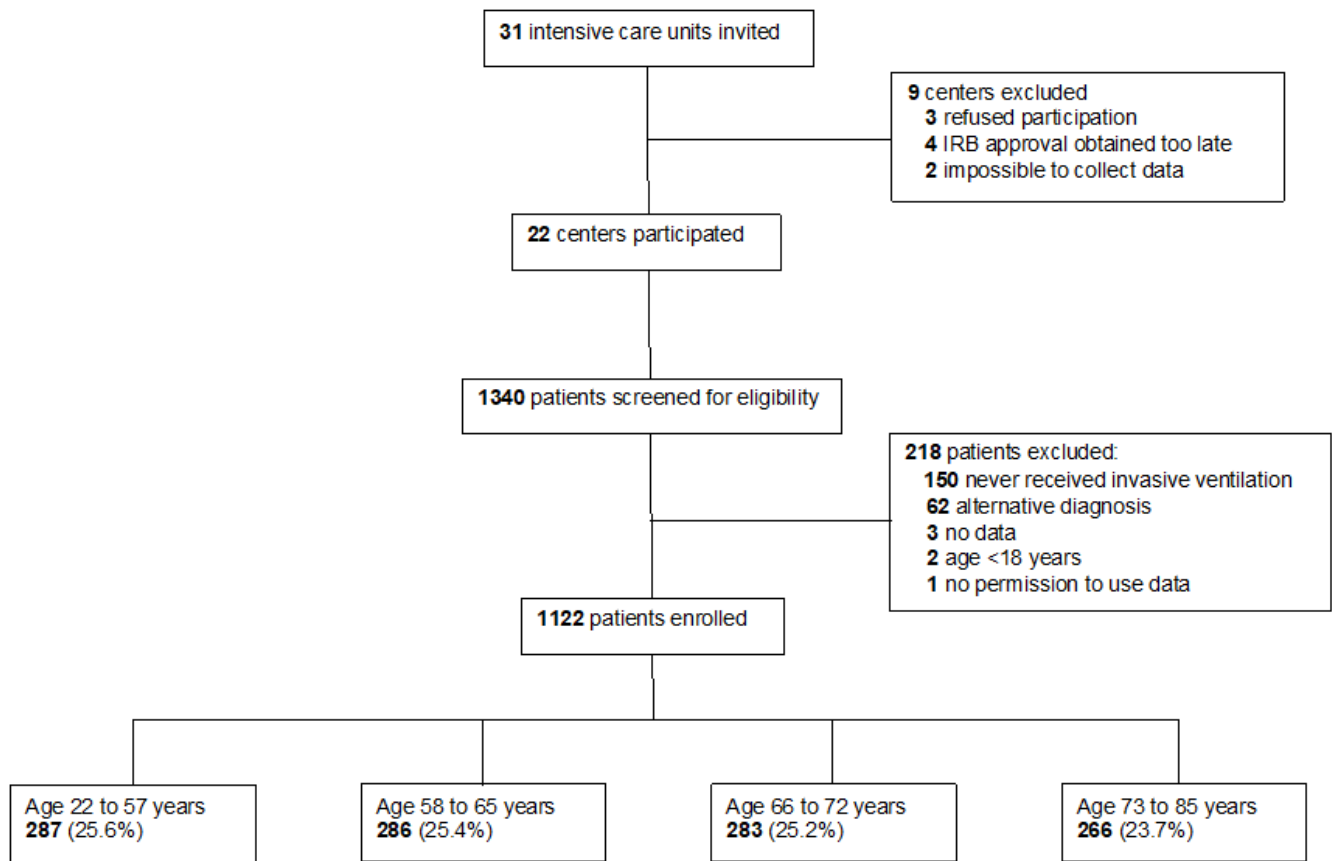

Supplementary Figure 1. CONSORT flow chart of study population.

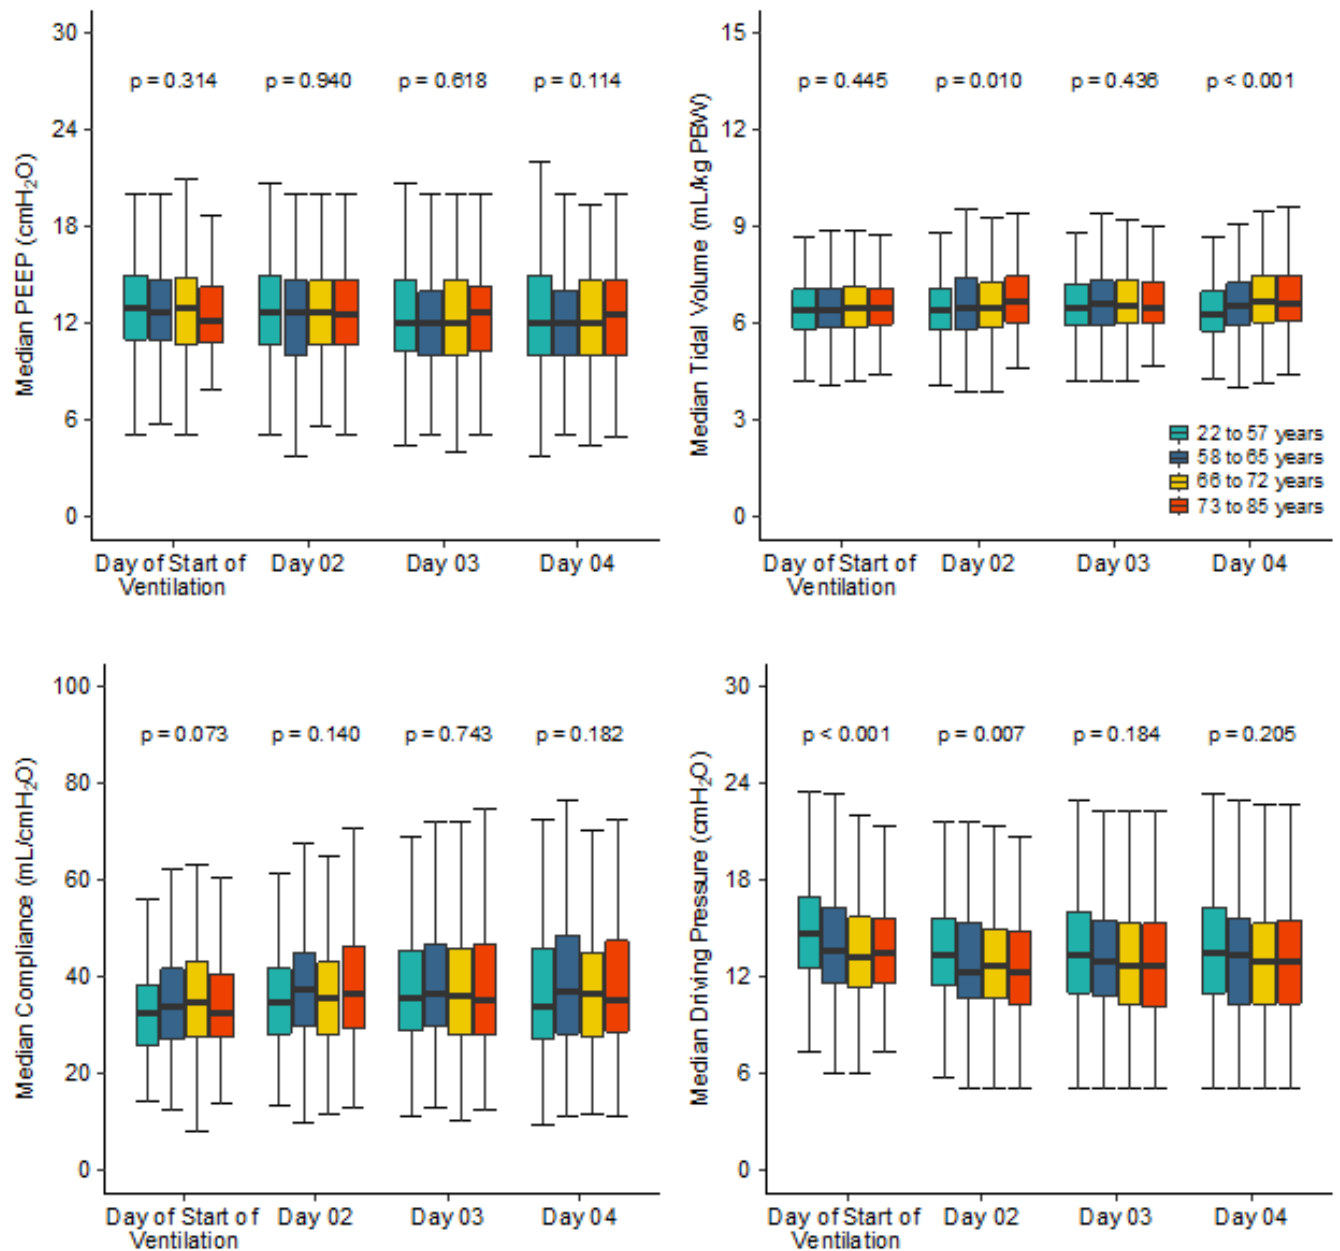

**Supplementary Figure 2. Ventilatory variables in the first four days of ventilation.** Boxes represent median and interquartile range. Median was calculated from the mean value of three or four measurements available on each day of ventilation. The Kruskal-Wallis test is used to calculate p-values.

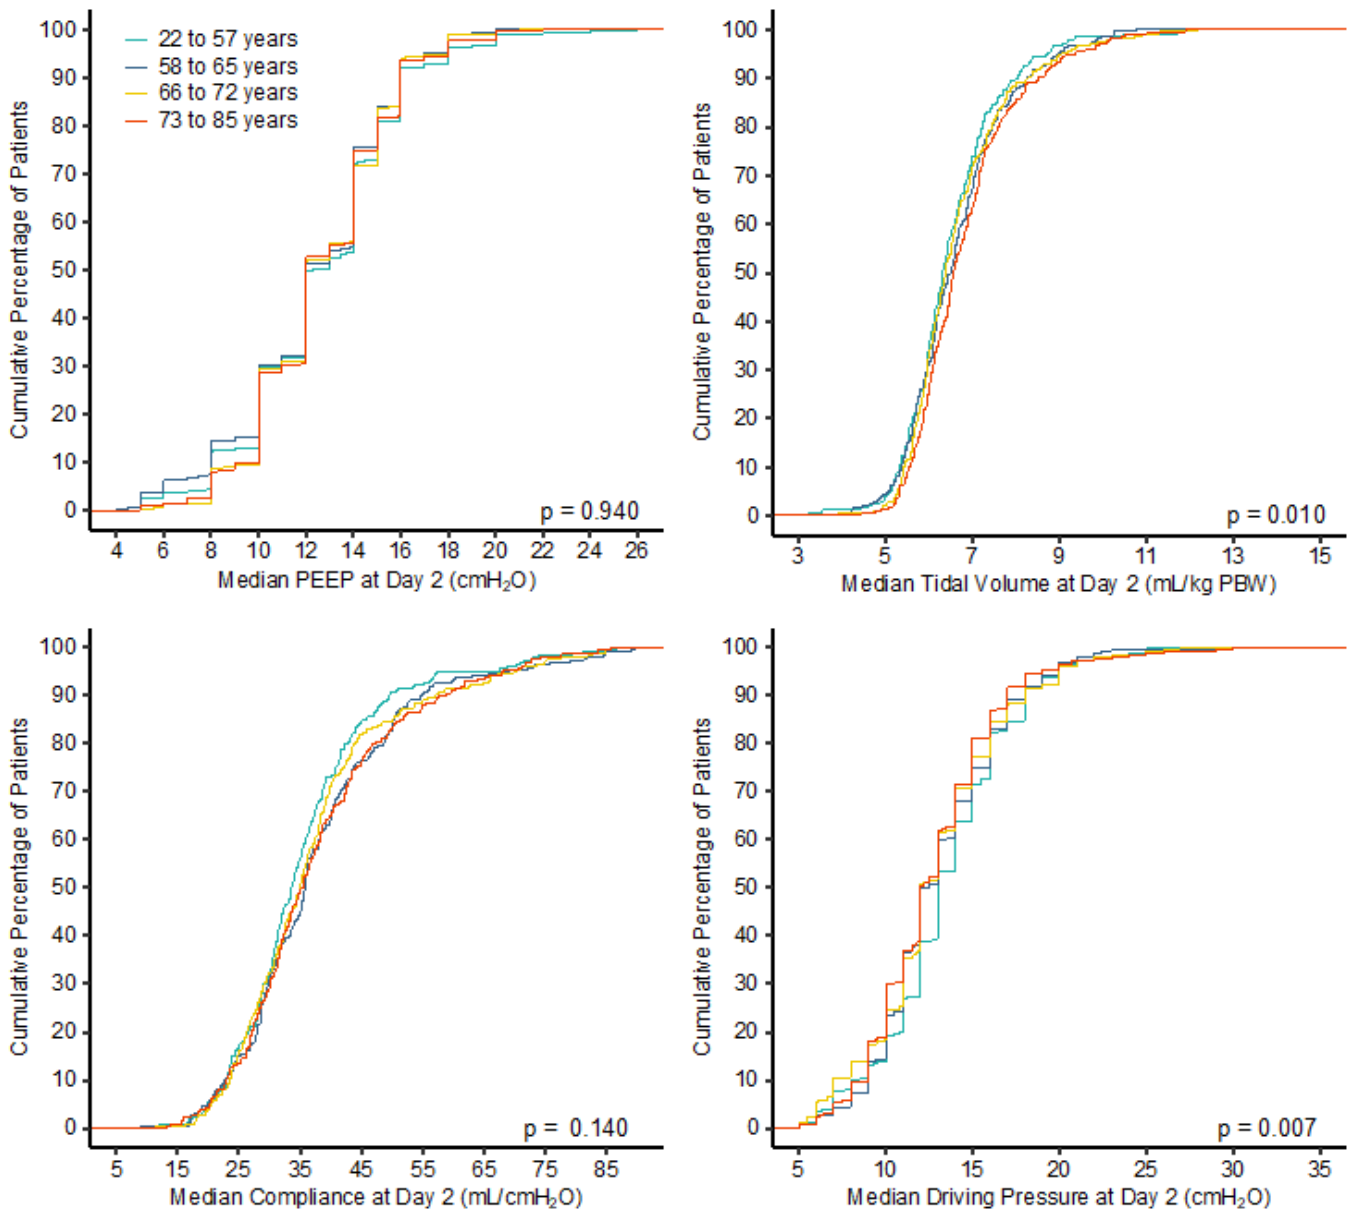

**Supplementary Figure 3. Cumulative frequency distribution of median PEEP to tidal volume to compliance and driving pressure on the second day of ventilation.** Mean values were calculated from three measurements available on the second day of ventilation. The Kruskal-Wallis test is used to calculate p-values.

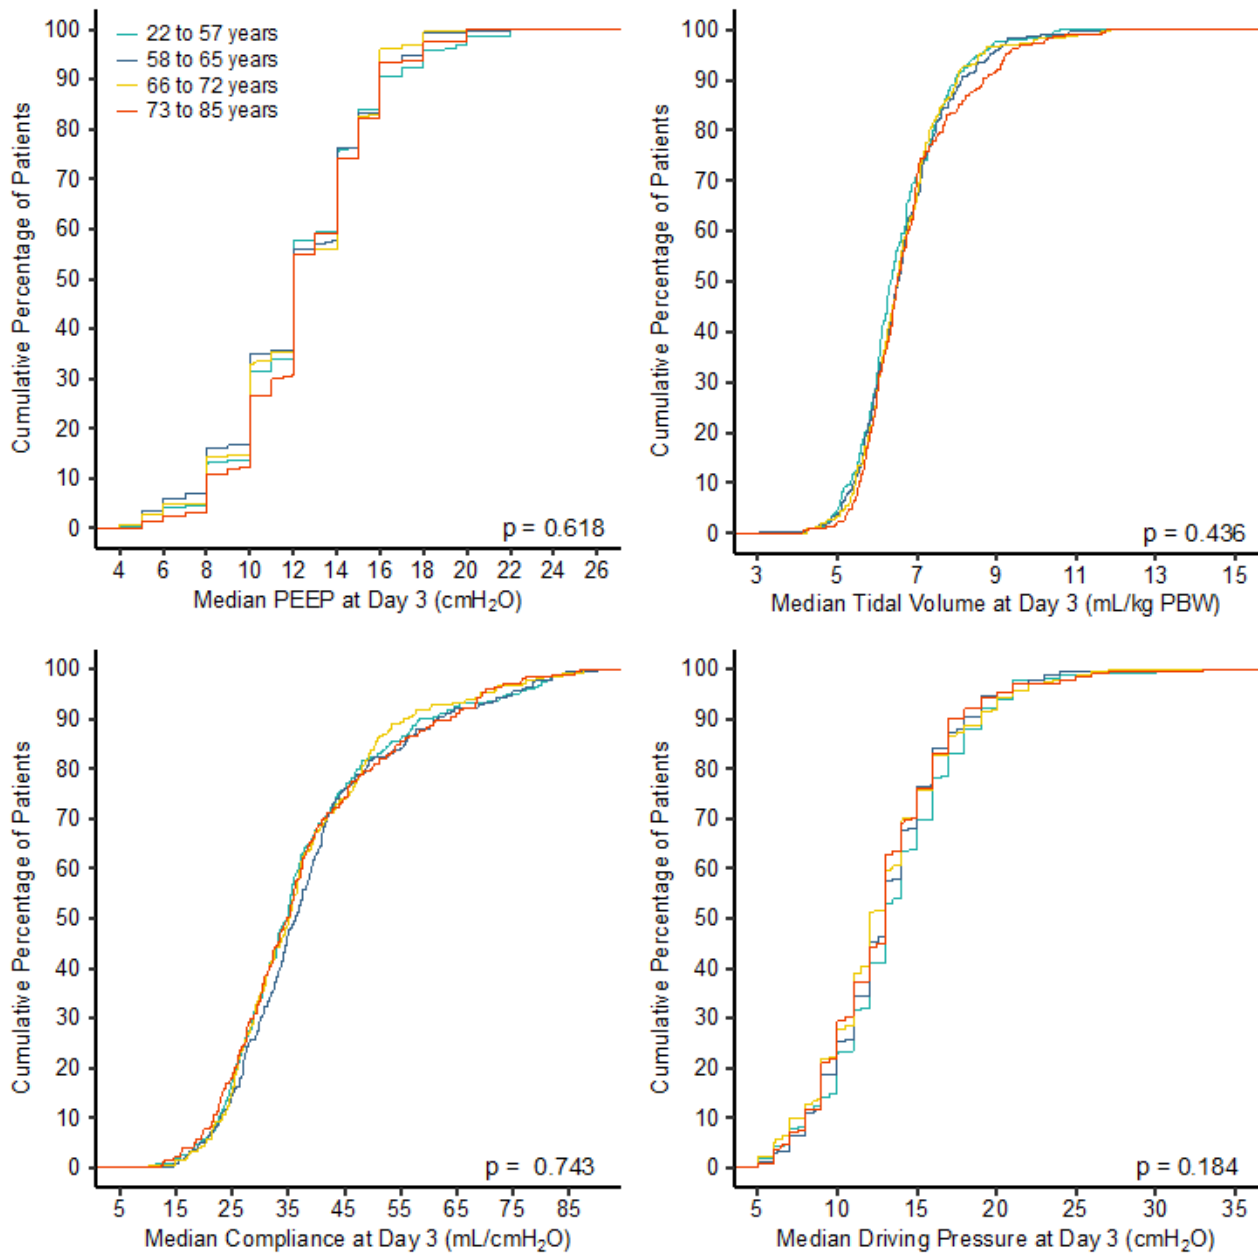

**Supplementary Figure 4. Cumulative frequency distribution of median PEEP to tidal volume to compliance and driving pressure on the third day of ventilation.** Mean values were calculated from three measurements available on the third day of ventilation. The Kruskal-Wallis test is used to calculate p-values.

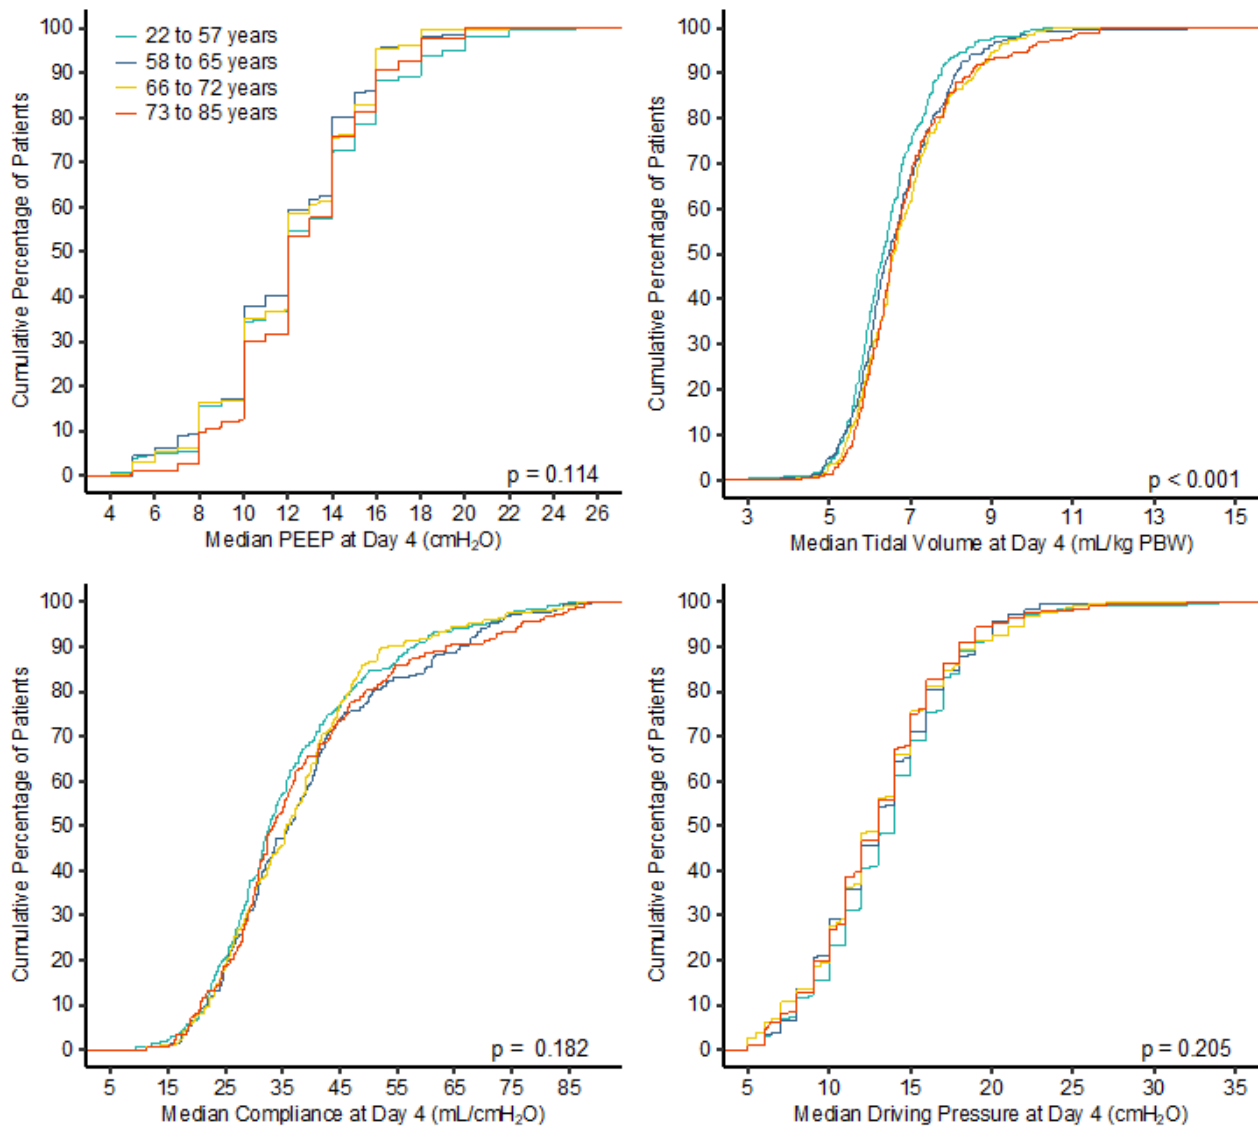

**Supplementary Figure 5. Cumulative frequency distribution of median PEEP to tidal volume to compliance and driving pressure on the fourth day of ventilation.** Mean values were calculated from three measurements available on the fourth day of ventilation. The Kruskal-Wallis test was used to calculate p-values.
