# Supplementary material for: The effect of age on ventilation management and clinical outcomes in critically ill COVID–19 patients––insights from the PRoVENT–COVID study
Source: publisher site journal article supplement (doi:10.18632/aging.203863), 2022-01-31
Supplement: Supplementary file [file aging-v14i3-203863-supplementary-material-SD3.pdf]

## SUPPLEMENTARY TABLES

**Supplementary Table 1. Characteristics of mechanical ventilation in the first four days of ventilation.**

|                                      | Age 22 to 57 years<br>(n = 287) | Age 58 to 65 years<br>(n = 286) | Age 66 to 72 years<br>(n = 283) | Age 73 to 85 years<br>(n = 266) | P value |
|--------------------------------------|---------------------------------|---------------------------------|---------------------------------|---------------------------------|---------|
| Tidal volume, mL/kg PBW              |                                 |                                 |                                 |                                 |         |
| Day 1                                | 6.4 [5.8 to 7.0]                | 6.4 [5.9 to 7.1]                | 6.5 [5.9 to 7.1]                | 6.5 [6.0 to 7.1]                | 0.445   |
| Day 2                                | 6.4 [5.8 to 7.1]                | 6.5 [5.8 to 7.4]                | 6.5 [5.9 to 7.3]                | 6.7 [6.0 to 7.4]                | 0.010   |
| Day 3                                | 6.5 [5.9 to 7.2]                | 6.6 [5.9 to 7.3]                | 6.5 [6.0 to 7.4]                | 6.5 [6.0 to 7.2]                | 0.437   |
| Day 4                                | 6.3 [5.8 to 7.0]                | 6.6 [5.9 to 7.2]                | 6.7 [6.0 to 7.5]                | 6.6 [6.1 to 7.5]                | <0.001  |
| PEEP, cmH <sub>2</sub> O             |                                 |                                 |                                 |                                 |         |
| Day 1                                | 13.0 [11.0 to 15.0]             | 12.7 [11.0 to 14.6]             | 13.0 [10.7 to 14.8]             | 12.2 [10.8 to 14.2]             | 0.314   |
| Day 2                                | 12.7 [10.7 to 15.0]             | 12.7 [10.0 to 14.7]             | 12.7 [10.7 to 14.7]             | 12.6 [10.7 to 14.7]             | 0.940   |
| Day 3                                | 12.0 [10.3 to 14.7]             | 12.0 [10.0 to 14.0]             | 12.0 [10.0 to 14.7]             | 12.7 [10.3 to 14.3]             | 0.618   |
| Day 4                                | 12.0 [10.0 to 15.0]             | 12.0 [10.0 to 14.0]             | 12.0 [10.0 to 14.7]             | 12.5 [10.0 to 14.7]             | 0.114   |
| Driving pressure, cmH <sub>2</sub> O |                                 |                                 |                                 |                                 |         |
| Day 1                                | 14.7 [12.5 to 17.0]             | 13.8 [11.7 to 16.3]             | 13.2 [11.3 to 15.7]             | 13.5 [11.6 to 15.7]             | <0.001  |
| Day 2                                | 13.3 [11.4 to 15.7]             | 12.3 [10.7 to 15.3]             | 12.7 [10.7 to 15.0]             | 12.4 [10.3 to 15.0]             | 0.007   |
| Day 3                                | 13.3 [11.0 to 16.0]             | 13.0 [10.8 to 15.5]             | 12.7 [10.3 to 15.3]             | 12.7 [10.1 to 15.3]             | 0.184   |
| Day 4                                | 13.7 [11.0 to 16.3]             | 13.3 [10.3 to 15.7]             | 13.0 [10.3 to 15.3]             | 13.0 [10.3 to 15.5]             | 0.205   |
| Compliance, mL/cmH <sub>2</sub> O    |                                 |                                 |                                 |                                 |         |
| Day 1                                | 32.4 [25.9 to 38.3]             | 33.8 [27.1 to 41.7]             | 34.7 [27.7 to 43.3]             | 32.6 [27.3 to 40.7]             | 0.073   |
| Day 2                                | 34.9 [28.4 to 42.2]             | 37.5 [29.8 to 45.4]             | 35.7 [28.3 to 43.5]             | 36.6 [29.6 to 46.7]             | 0.140   |
| Day 3                                | 35.5 [28.9 to 45.4]             | 36.5 [29.6 to 47.0]             | 36.0 [28.2 to 47.1]             | 35.4 [27.9 to 47.5]             | 0.743   |
| Day 4                                | 33.9 [26.9 to 45.6]             | 36.8 [28.6 to 49.1]             | 37.0 [27.9 to 47.0]             | 35.3 [28.7 to 49.4]             | 0.182   |
| Peak pressure, cmH <sub>2</sub> O    |                                 |                                 |                                 |                                 |         |
| Day 1                                | 27.7 [25.0 to 30.8]             | 26.7 [23.3 to 30.0]             | 26.0 [23.3 to 29.2]             | 26.2 [23.6 to 29.0]             | <0.001  |
| Day 2                                | 26.3 [23.0 to 29.7]             | 25.3 [22.3 to 29.0]             | 25.7 [22.0 to 28.3]             | 25.3 [22.0 to 28.3]             | 0.102   |
| Day 3                                | 26.0 [22.0 to 29.7]             | 25.7 [21.3 to 28.5]             | 25.3 [20.7 to 28.8]             | 25.3 [21.3 to 29.0]             | 0.362   |
| Day 4                                | 26.3 [22.0 to 29.7]             | 25.3 [20.4 to 28.9]             | 25.3 [20.7 to 28.7]             | 25.3 [22.0 to 29.3]             | 0.145   |
| Mechanical power, J/min              |                                 |                                 |                                 |                                 |         |
| Day 1                                | 19.2 [16.0 to 23.7]             | 19.3 [15.9 to 23.1]             | 17.9 [14.7 to 22.3]             | 17.2 [14.6 to 20.9]             | <0.001  |
| Day 2                                | 18.8 [15.7 to 23.5]             | 19.1 [15.8 to 23.2]             | 18.6 [14.6 to 22.9]             | 18.1 [14.4 to 22.3]             | 0.237   |
| Day 3                                | 19.2 [15.1 to 24.1]             | 19.7 [15.4 to 23.8]             | 18.8 [14.9 to 22.6]             | 18.7 [15.2 to 23.1]             | 0.619   |
| Day 4                                | 19.2 [15.9 to 24.0]             | 19.5 [15.2 to 23.9]             | 19.3 [15.1 to 23.3]             | 19.3 [16.3 to 23.5]             | 0.882   |
| PaCO <sub>2</sub> , mmHg             |                                 |                                 |                                 |                                 |         |
| Day 1                                | 42.9 [38.3 to 48.4]             | 44.6 [39.8 to 49.5]             | 46.1 [39.9 to 52.0]             | 45.0 [39.1 to 50.9]             | 0.002   |
| Day 2                                | 44.5 [40.0 to 49.5]             | 46.6 [41.8 to 52.5]             | 45.4 [42.0 to 53.3]             | 45.5 [40.6 to 51.8]             | 0.060   |
| Day 3                                | 46.8 [42.5 to 54.8]             | 48.3 [43.4 to 53.8]             | 47.3 [42.8 to 55.3]             | 47.3 [41.8 to 54.0]             | 0.483   |
| Day 4                                | 48.5 [43.3 to 55.3]             | 49.3 [44.5 to 54.3]             | 48.8 [43.8 to 56.0]             | 48.6 [42.5 to 54.3]             | 0.724   |
| EtCO <sub>2</sub> , mmHg             |                                 |                                 |                                 |                                 |         |
| Day 1                                | 38.0 [33.8 to 43.8]             | 37.7 [33.3 to 42.8]             | 36.3 [31.9 to 42.0]             | 35.3 [31.6 to 39.9]             | <0.001  |
| Day 2                                | 39.8 [35.5 to 44.3]             | 38.6 [34.8 to 44.3]             | 36.8 [32.2 to 41.3]             | 36.8 [31.8 to 41.4]             | <0.001  |
| Day 3                                | 41.0 [36.3 to 46.5]             | 38.8 [34.5 to 43.0]             | 37.5 [33.3 to 42.5]             | 36.5 [32.8 to 42.7]             | <0.001  |
| Day 4                                | 42.3 [37.0 to 49.0]             | 38.5 [35.0 to 44.3]             | 37.5 [32.2 to 42.8]             | 37.5 [33.0 to 42.5]             | <0.001  |
| FiO <sub>2</sub>                     |                                 |                                 |                                 |                                 |         |
| Day 1                                | 0.6 [0.5 to 0.7]                | 0.6 [0.5 to 0.7]                | 0.6 [0.5 to 0.7]                | 0.6 [0.5 to 0.7]                | 0.286   |
| Day 2                                | 0.4 [0.4 to 0.5]                | 0.4 [0.4 to 0.5]                | 0.4 [0.4 to 0.5]                | 0.5 [0.4 to 0.5]                | 0.269   |
| Day 3                                | 0.4 [0.4 to 0.5]                | 0.4 [0.4 to 0.5]                | 0.4 [0.4 to 0.5]                | 0.4 [0.4 to 0.5]                | 0.750   |
| Day 4                                | 0.4 [0.4 to 0.5]                | 0.4 [0.4 to 0.5]                | 0.5 [0.4 to 0.6]                | 0.5 [0.4 to 0.6]                | 0.294   |
| PaO <sub>2</sub> , mmHg              |                                 |                                 |                                 |                                 |         |
| Day 1                                | 81.0 [71.5 to 99.3]             | 78.7 [71.3 to 93.4]             | 82.4 [72.7 to 95.4]             | 83.3 [75.0 to 96.0]             | 0.018   |
| Day 2                                | 75.0 [69.3 to 86.3]             | 75.3 [69.1 to 84.7]             | 75.5 [69.8 to 84.5]             | 76.5 [69.7 to 84.5]             | 0.782   |
| Day 3                                | 72.5 [67.1 to 82.1]             | 72.3 [66.0 to 80.8]             | 74.5 [67.4 to 81.3]             | 73.8 [67.5 to 81.0]             | 0.443   |
| Day 4                                | 72.0 [66.0 to 80.3]             | 70.8 [64.9 to 78.3]             | 72.3 [66.1 to 79.3]             | 73.1 [68.0 to 80.3]             | 0.120   |

**Supplementary Table 2. Posthoc dunn test for paired comparison for patient outcomes.**

| <b>Tracheostomy</b>                         |                  | <b>Age 22 to 57 years</b> | <b>Age 58 to 65 years</b> | <b>Age 66 to 72 years</b> |
|---------------------------------------------|------------------|---------------------------|---------------------------|---------------------------|
| Age 58 to 65 years                          | Z test statistic | -2.992                    |                           |                           |
|                                             | P value          | 0.008                     |                           |                           |
| Age 66 to 72 years                          | Z test statistic | -1.504                    | 1.478                     |                           |
|                                             | P value          | 0.397                     | 0.148                     |                           |
| Age 73 to 85 years                          | Z test statistic | -1.433                    | 1.508                     | 0.050                     |
|                                             | P value          | 0.455                     | 0.395                     | 1.000                     |
| <b>Myocardial infarction</b>                |                  | <b>Age 22 to 57 years</b> | <b>Age 58 to 65 years</b> | <b>Age 66 to 72 years</b> |
| Age 58 to 65 years                          | Z test statistic | 0.703                     |                           |                           |
|                                             | P value          | 1.000                     |                           |                           |
| Age 66 to 72 years                          | Z test statistic | -1.788                    | -2.487                    |                           |
|                                             | P value          | 0.221                     | 0.039                     |                           |
| Age 73 to 85 years                          | Z test statistic | -1.916                    | -2.605                    | -0.156                    |
|                                             | P value          | 0.166                     | 0.028                     | 1.000                     |
| <b>Acute Kidney injury</b>                  |                  | <b>Age 22 to 57 years</b> | <b>Age 58 to 65 years</b> | <b>Age 66 to 72 years</b> |
| Age 58 to 65 years                          | Z test statistic | -4.358                    |                           |                           |
|                                             | P value          | <0.001                    |                           |                           |
| Age 66 to 72 years                          | Z test statistic | -3.315                    | 1.025                     |                           |
|                                             | P value          | 0.003                     | 0.916                     |                           |
| Age 73 to 85 years                          | Z test statistic | -5.242                    | -0.963                    | -1.966                    |
|                                             | P value          | <0.001                    | 1.000                     | 0.148                     |
| <b>Need for renal replacement therapy</b>   |                  | <b>Age 22 to 57 years</b> | <b>Age 58 to 65 years</b> | <b>Age 66 to 72 years</b> |
| Age 58 to 65 years                          | Z test statistic | -2.936                    |                           |                           |
|                                             | P value          | 0.010                     |                           |                           |
| Age 66 to 72 years                          | Z test statistic | -2.454                    | 0.474                     |                           |
|                                             | P value          | 0.042                     | 1.000                     |                           |
| Age 73 to 85 years                          | Z test statistic | -2.121                    | 0.761                     | 0.293                     |
|                                             | P value          | 0.102                     | 1.000                     | 1.000                     |
| <b>Use of neuromuscular blocking agents</b> |                  | <b>Age 22 to 57 years</b> | <b>Age 58 to 65 years</b> | <b>Age 66 to 72 years</b> |
| Age 58 to 65 years                          | Z test statistic | 1.881                     |                           |                           |
|                                             | P value          | 0.180                     |                           |                           |
| Age 66 to 72 years                          | Z test statistic | 1.083                     | -0.792                    |                           |
|                                             | P value          | 0.837                     | 1.000                     |                           |
| Age 73 to 85 years                          | Z test statistic | 3.588                     | 1.740                     | 2.514                     |
|                                             | P value          | 0.001                     | 0.246                     | 0.036                     |
| <b>Ventilator-free days at day 28</b>       |                  | <b>Age 22 to 57 years</b> | <b>Age 58 to 65 years</b> | <b>Age 66 to 72 years</b> |
| Age 58 to 65 years                          | Z test statistic | 4.488                     |                           |                           |
|                                             | P value          | <0.001                    |                           |                           |
| Age 66 to 72 years                          | Z test statistic | 6.9400                    | 2.446                     |                           |
|                                             | P value          | <0.001                    | 0.043                     |                           |
| Age 73 to 85 years                          | Z test statistic | 9.309                     | 4.855                     | 2.435                     |
|                                             | P value          | <0.001                    | <0.001                    | 0.045                     |

**Supplementary Table 3. Multivariable assessment of factors associated with 28-day and 90-day mortality.**

|                                                | 28-day mortality         |         | 90-day mortality         |         |
|------------------------------------------------|--------------------------|---------|--------------------------|---------|
|                                                | Hazard ratio<br>(95% CI) | P value | Hazard ratio<br>(95% CI) | P value |
| <b>Age category</b>                            |                          |         |                          |         |
| Age 22 to 57 years                             | 1 (reference)            |         | 1 (reference)            |         |
| Age 58 to 65 years                             | 1.37 (0.89 to 2.11)      | 0.150   | 1.49 (1.00 to 2.23)      | 0.050   |
| Age 66 to 72 years                             | 2.16 (1.43 to 3.25)      | <0.001  | 2.32 (1.59 to 3.40)      | <0.001  |
| Age 73 to 85 years                             | 3.35 (2.24 to 5.01)      | <0.001  | 4.05 (2.77 to 5.93)      | <0.001  |
| <b>Demographic characteristics</b>             |                          |         |                          |         |
| Male gender                                    | 1.16 (0.88 to 1.52)      | 0.290   | 1.25 (0.96 to 1.62)      | 0.093   |
| Body-mass index to kg/m <sup>2</sup>           | 0.97 (0.85 to 1.10)      | 0.630   | 1.00 (0.90 to 1.11)      | 0.980   |
| Hypertension                                   | 1.32 (1.02 to 1.72)      | 0.038   | 1.15 (0.89 to 1.47)      | 0.280   |
| Heart failure                                  | 1.15 (0.70 to 1.88)      | 0.570   | 1.10 (0.69 to 1.78)      | 0.680   |
| Diabetes mellitus                              | 1.38 (1.05 to 1.82)      | 0.019   | 1.42 (1.09 to 1.84)      | 0.008   |
| Chronic kidney disease                         | 0.98 (0.58 to 1.66)      | 0.940   | 1.17 (0.72 to 1.89)      | 0.520   |
| Chronic obstructive pulmonary disease          | 1.53 (1.05 to 2.22)      | 0.028   | 1.51 (1.06 to 2.16)      | 0.023   |
| Active hematological neoplasia                 | 1.85 (0.80 to 4.27)      | 0.150   | 1.65 (0.76 to 3.59)      | 0.210   |
| Active solid tumor                             | 1.59 (0.84 to 2.99)      | 0.150   | 1.20 (0.64 to 2.24)      | 0.570   |
| Use of angiotensin-converting enzyme inhibitor | 1.00 (0.73 to 1.36)      | 1.000   | 0.83 (0.61 to 1.12)      | 0.220   |
| Use of angiotensin II receptor blocker         | 0.91 (0.64 to 1.31)      | 0.620   | 0.89 (0.63 to 1.25)      | 0.490   |
| <b>Organ support on day 0*</b>                 |                          |         |                          |         |
| Use of vasopressor or inotropes                | 1.11 (0.81 to 1.51)      | 0.510   | 1.09 (0.81 to 1.46)      | 0.570   |
| Fluid balance to mL                            | 1.07 (0.96 to 1.21)      | 0.230   | 1.04 (0.93 to 1.16)      | 0.460   |
| <b>Oxygenation variables on day 0*</b>         |                          |         |                          |         |
| PaO <sub>2</sub> /FiO <sub>2</sub>             | 0.88 (0.76 to 1.01)      | 0.065   | 0.88 (0.77 to 1.00)      | 0.044   |
| <b>Laboratory tests on day 0*</b>              |                          |         |                          |         |
| Creatinine to μmol/L                           | 1.00 (0.91 to 1.09)      | 0.980   | 1.02 (0.94 to 1.10)      | 0.620   |
| pH                                             | 0.71 (0.62 to 0.82)      | <0.001  | 0.73 (0.64 to 0.83)      | <0.001  |
| <b>Vital signs on day 0*</b>                   |                          |         |                          |         |
| Mean arterial pressure to mm Hg                | 0.89 (0.79 to 1.01)      | 0.066   | 0.89 (0.79 to 1.00)      | 0.051   |
| Heart rate to beats per minute                 | 1.07 (0.94 to 1.22)      | 0.300   | 1.08 (0.96 to 1.22)      | 0.210   |

The models are mixed-effects models with centers as a random effect. \*Median value on the first day of invasive ventilation.

**Supplementary Table 4. Multivariable assessment of factors associated with hospital and ICU mortality.**

|                                                | Hospital mortality     |         | ICU mortality          |         |
|------------------------------------------------|------------------------|---------|------------------------|---------|
|                                                | Odds ratio<br>(95% CI) | P value | Odds ratio<br>(95% CI) | P value |
| <b>Age category</b>                            |                        |         |                        |         |
| Age 22 to 57 years                             | 1 (reference)          |         | 1 (reference)          |         |
| Age 58 to 65 years                             | 1.67 (1.05 to 2.65)    | 0.030   | 1.63 (1.03 to 2.58)    | 0.037   |
| Age 66 to 72 years                             | 3.30 (2.08 to 5.24)    | <0.001  | 3.04 (1.92 to 4.79)    | <0.001  |
| Age 73 to 85 years                             | 5.35 (3.33 to 8.61)    | <0.001  | 4.64 (2.90 to 7.42)    | <0.001  |
| <b>Demographic characteristics</b>             |                        |         |                        |         |
| Male gender                                    | 1.48 (1.04 to 2.09)    | 0.028   | 1.40 (1.00 to 1.96)    | 0.051   |
| Body-mass index to kg/m <sup>2</sup>           | 0.99 (0.85 to 1.14)    | 0.872   | 0.99 (0.85 to 1.14)    | 0.845   |
| Hypertension                                   | 1.08 (0.75 to 1.54)    | 0.688   | 1.00 (0.70 to 1.41)    | 0.992   |
| Heart failure                                  | 0.97 (0.48 to 1.94)    | 0.923   | 0.99 (0.50 to 1.95)    | 0.971   |
| Diabetes mellitus                              | 1.43 (1.00 to 2.05)    | 0.053   | 1.44 (1.01 to 2.06)    | 0.043   |
| Chronic kidney disease                         | 1.42 (0.67 to 3.00)    | 0.357   | 1.45 (0.70 to 2.99)    | 0.321   |
| Chronic obstructive pulmonary disease          | 1.56 (0.91 to 2.67)    | 0.108   | 1.50 (0.89 to 2.51)    | 0.218   |
| Active hematological neoplasia                 | 2.29 (0.74 to 7.14)    | 0.152   | 2.55 (0.85 to 7.66)    | 0.095   |
| Active solid tumor                             | 1.05 (0.44 to 2.52)    | 0.916   | 1.18 (0.50 to 2.81)    | 0.701   |
| Use of angiotensin-converting enzyme inhibitor | 0.78 (0.51 to 1.19)    | 0.253   | 0.88 (0.58 to 1.34)    | 0.556   |
| Use of angiotensin II receptor blocker         | 0.88 (0.53 to 1.45)    | 0.600   | 0.95 (0.58 to 1.55)    | 0.823   |
| <b>Organ support on day 0*</b>                 |                        |         |                        |         |
| Use of vasopressor or inotropes                | 1.15 (0.79 to 1.69)    | 0.465   | 1.16 (0.80 to 1.69)    | 0.435   |
| Fluid balance to mL                            | 1.00 (0.86 to 1.17)    | 0.954   | 1.05 (0.90 to 1.22)    | 0.525   |
| <b>Oxygenation variables on day 0*</b>         |                        |         |                        |         |
| PaO <sub>2</sub> /FiO <sub>2</sub>             | 0.86 (0.73 to 1.03)    | 0.098   | 0.83 (0.70 to 0.98)    | 0.031   |
| <b>Laboratory tests on day 0*</b>              |                        |         |                        |         |
| Creatinine to μmol/L                           | 1.09 (0.92 to 1.29)    | 0.321   | 1.07 (0.92 to 1.24)    | 0.405   |
| pH                                             | 0.68 (0.57 to 0.81)    | <0.001  | 0.69 (0.59 to 0.82)    | <0.001  |
| <b>Vital signs on day 0*</b>                   |                        |         |                        |         |
| Mean arterial pressure to mm Hg                | 0.86 (0.73 to 1.01)    | 0.062   | 0.87 (0.74 to 1.01)    | 0.069   |
| Heart rate to beats per minute                 | 1.10 (0.94 to 1.30)    | 0.245   | 1.07 (0.91 to 1.26)    | 0.392   |

The models are mixed-effects models with centers as a random effect. \*Median value on the first day of invasive ventilation.
